# Supplementary material
Source: Springer Nature journal article supplement (https://www.springermedizin.de/resource/supplementary/12958_2010_755_MOESM3_ESM.pdf/9568408)

## Monkey

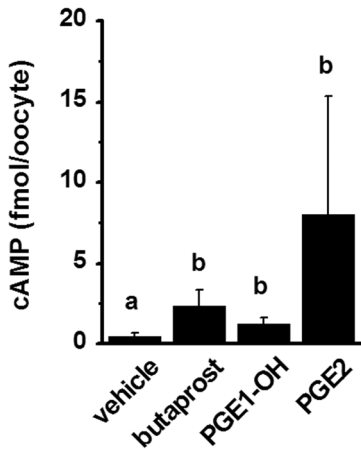

## Mouse

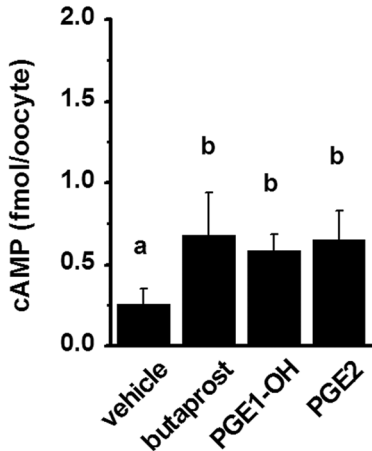

Supplement: MOESM3 [file 9568408]
